# Supplementary material
Source: PubMed Central journal article supplement (PMC6345262)
Supplement: NIHMS1006932-supplement-Supplemental_Materials.pdf [file NIHMS1006932-supplement-Supplemental_Materials.pdf]

**A**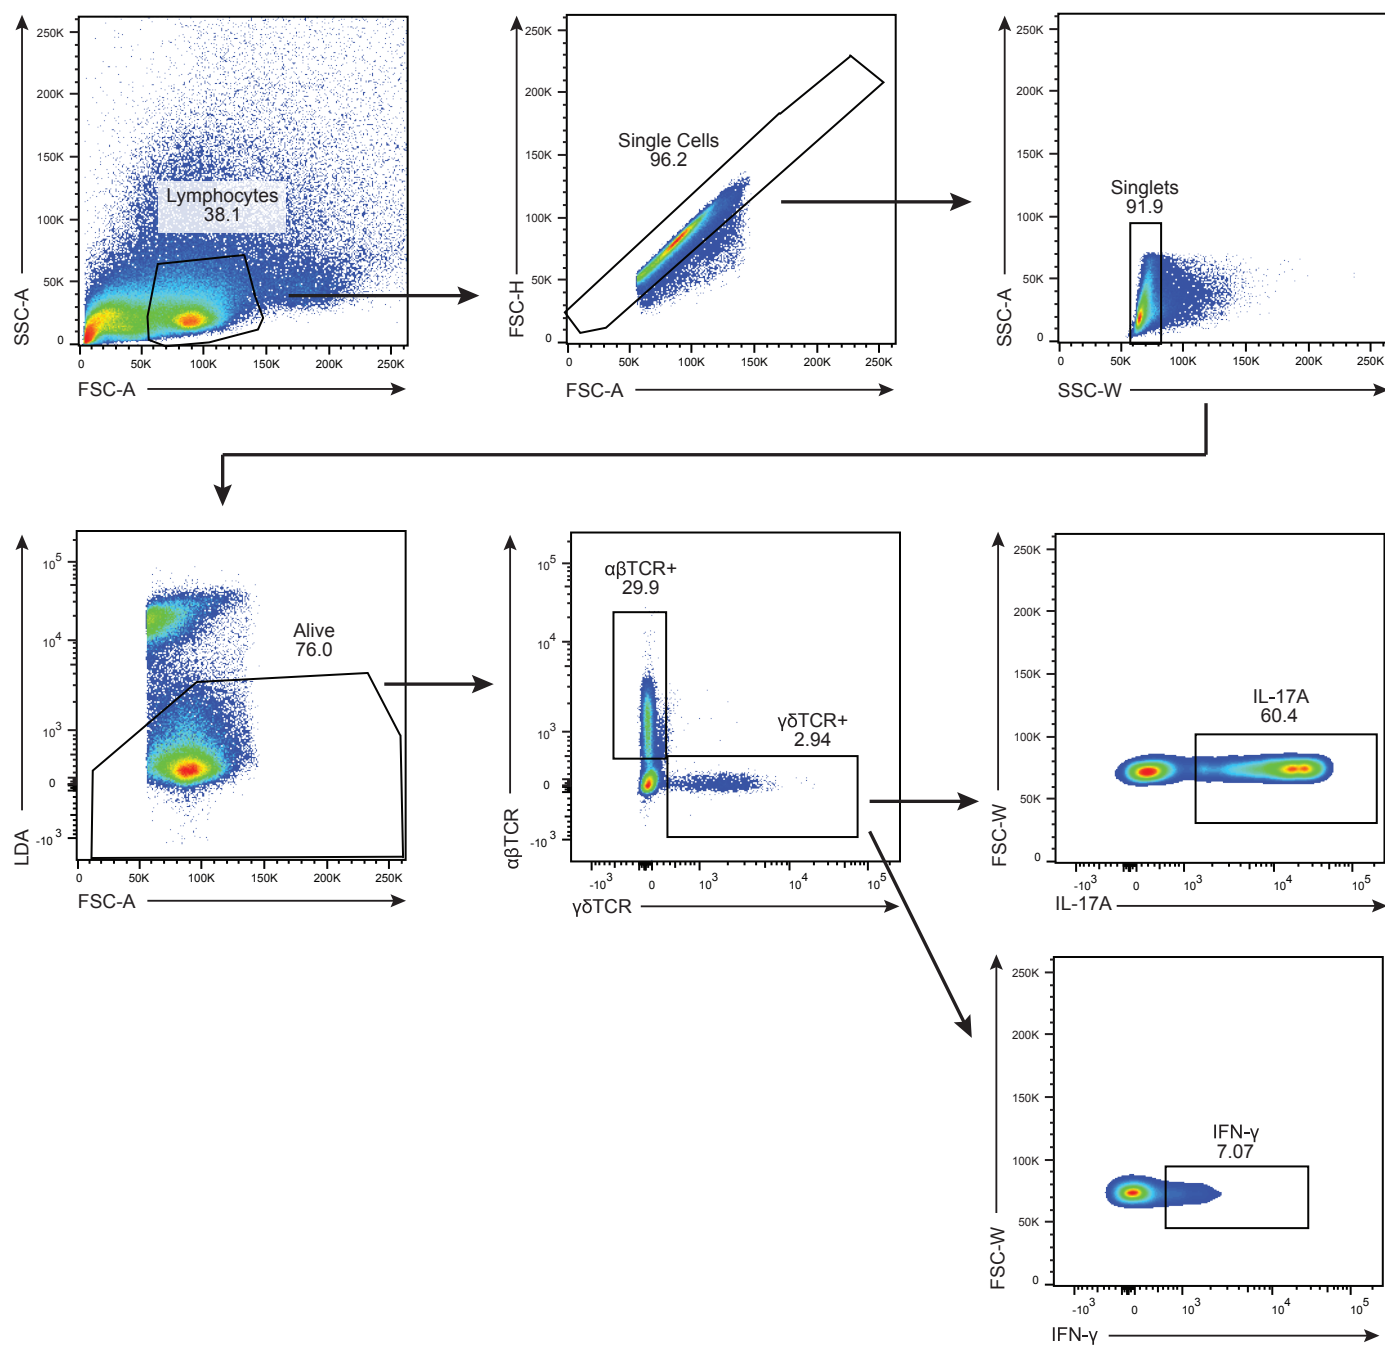**B**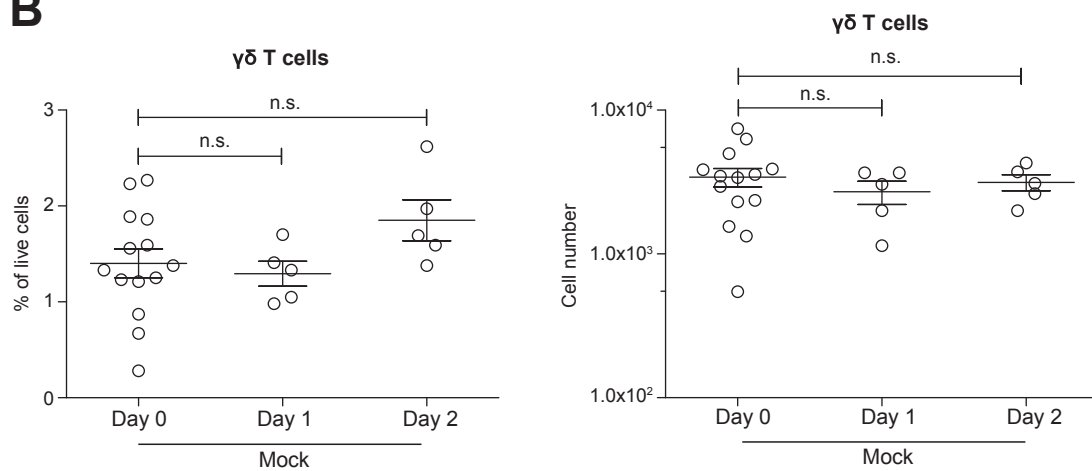**Figure S1**

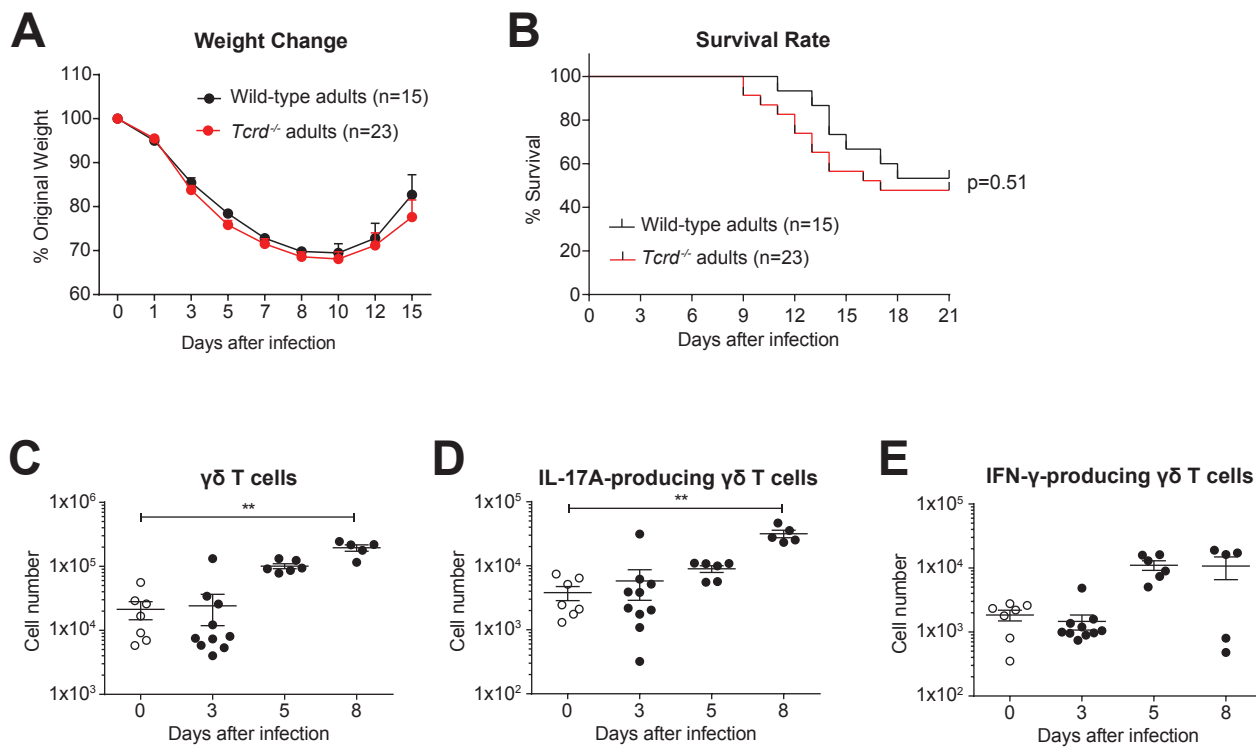

Figure S2

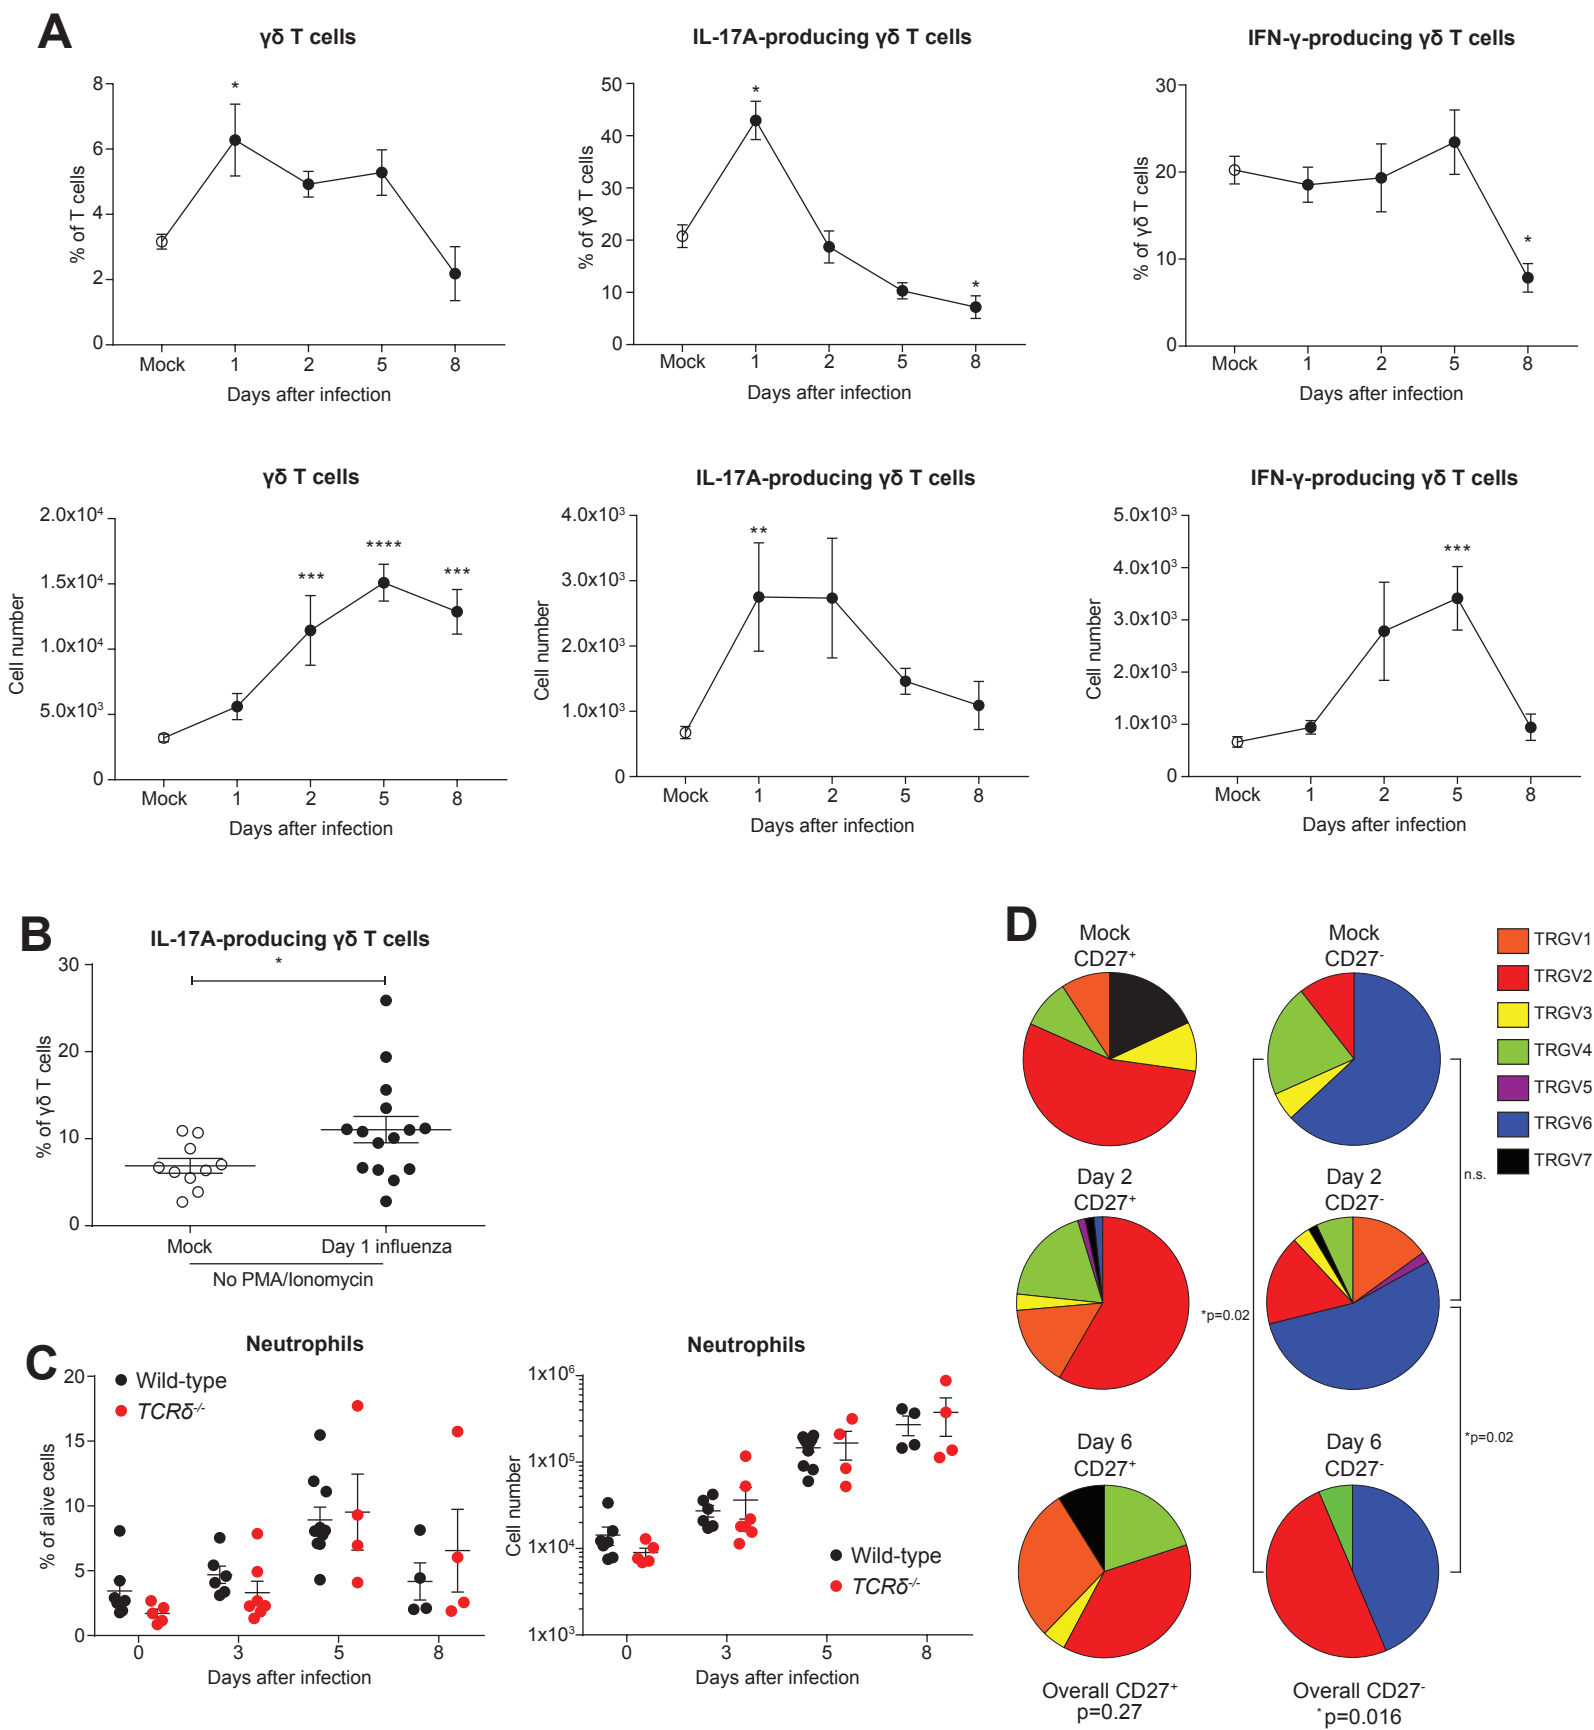

**Figure S3**

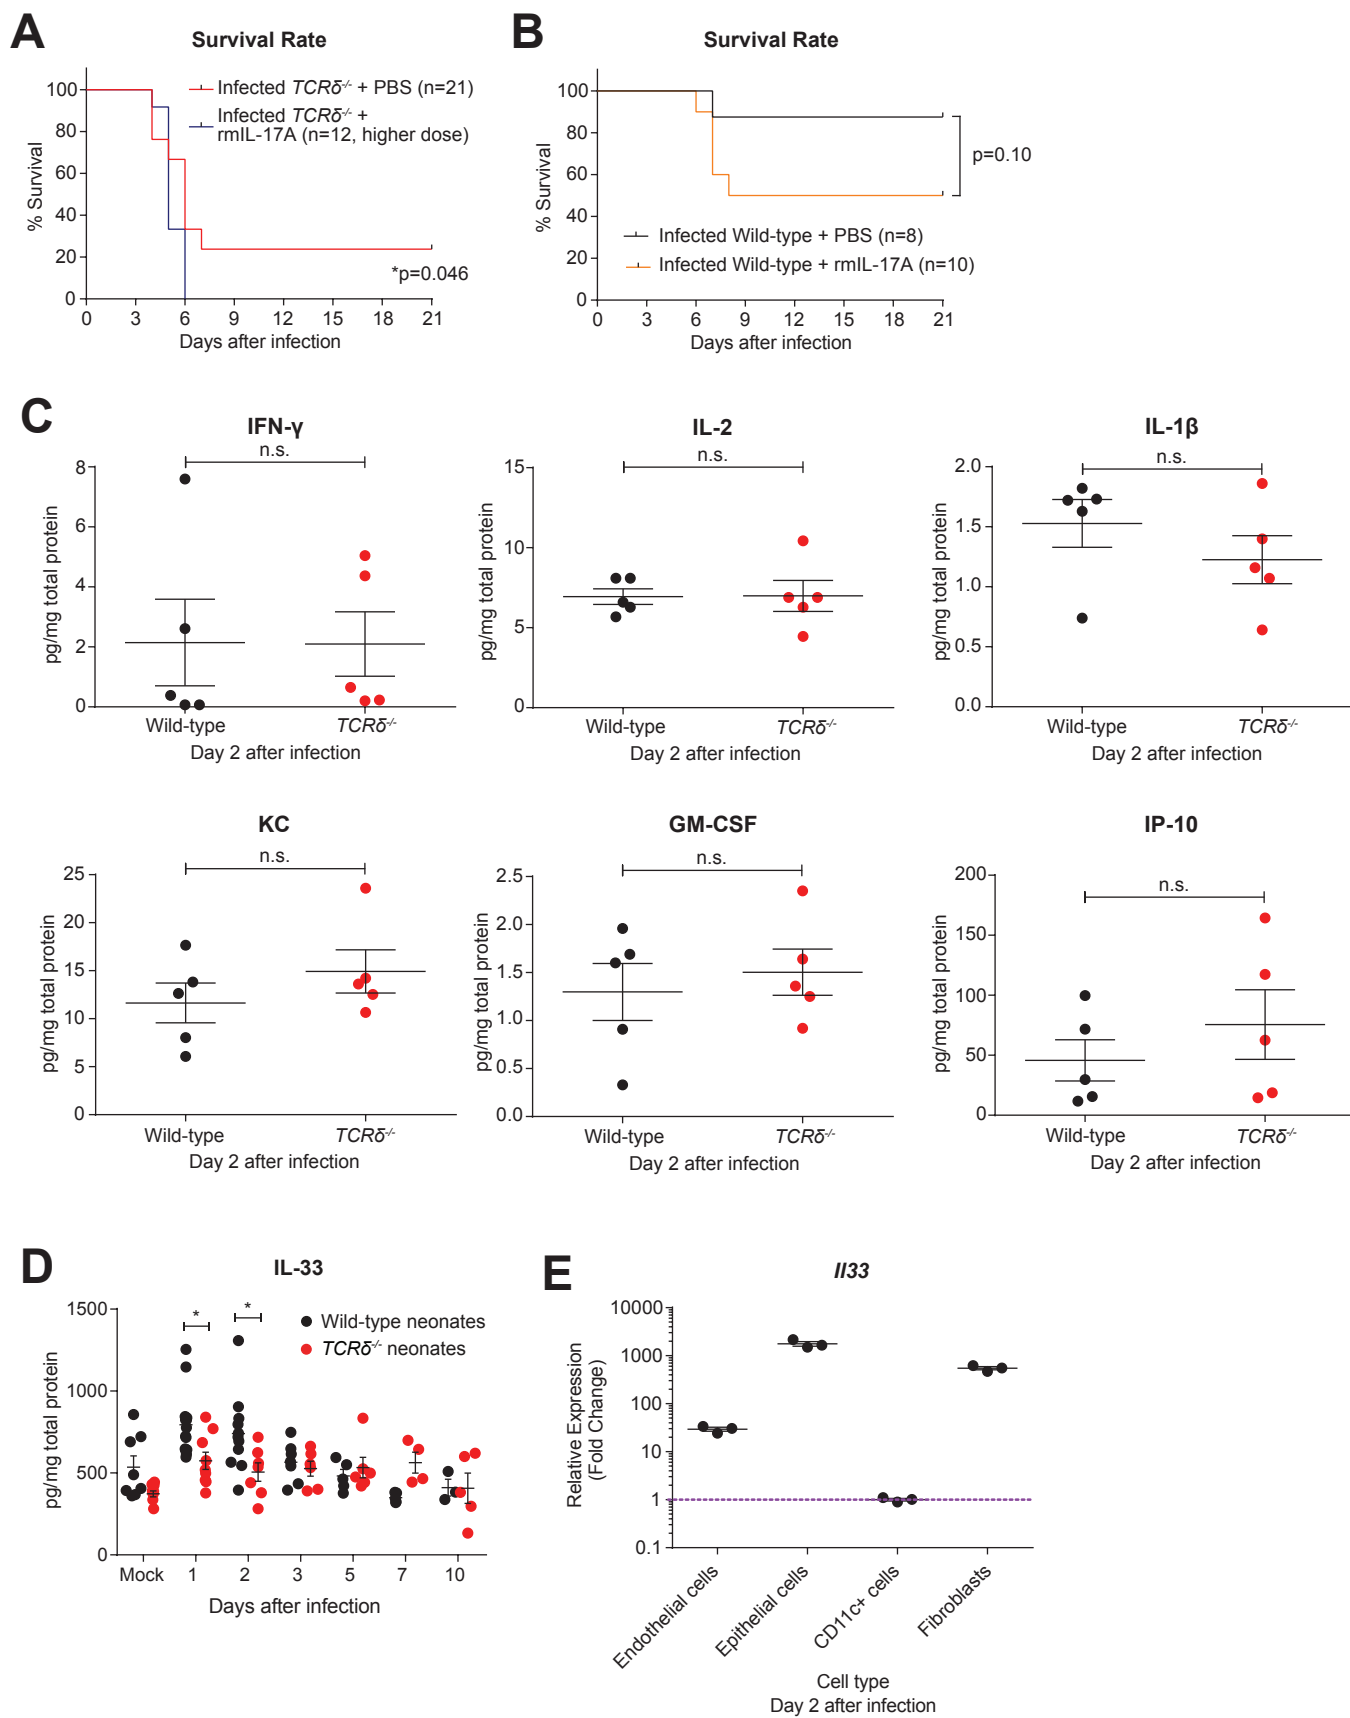

**Figure S4**

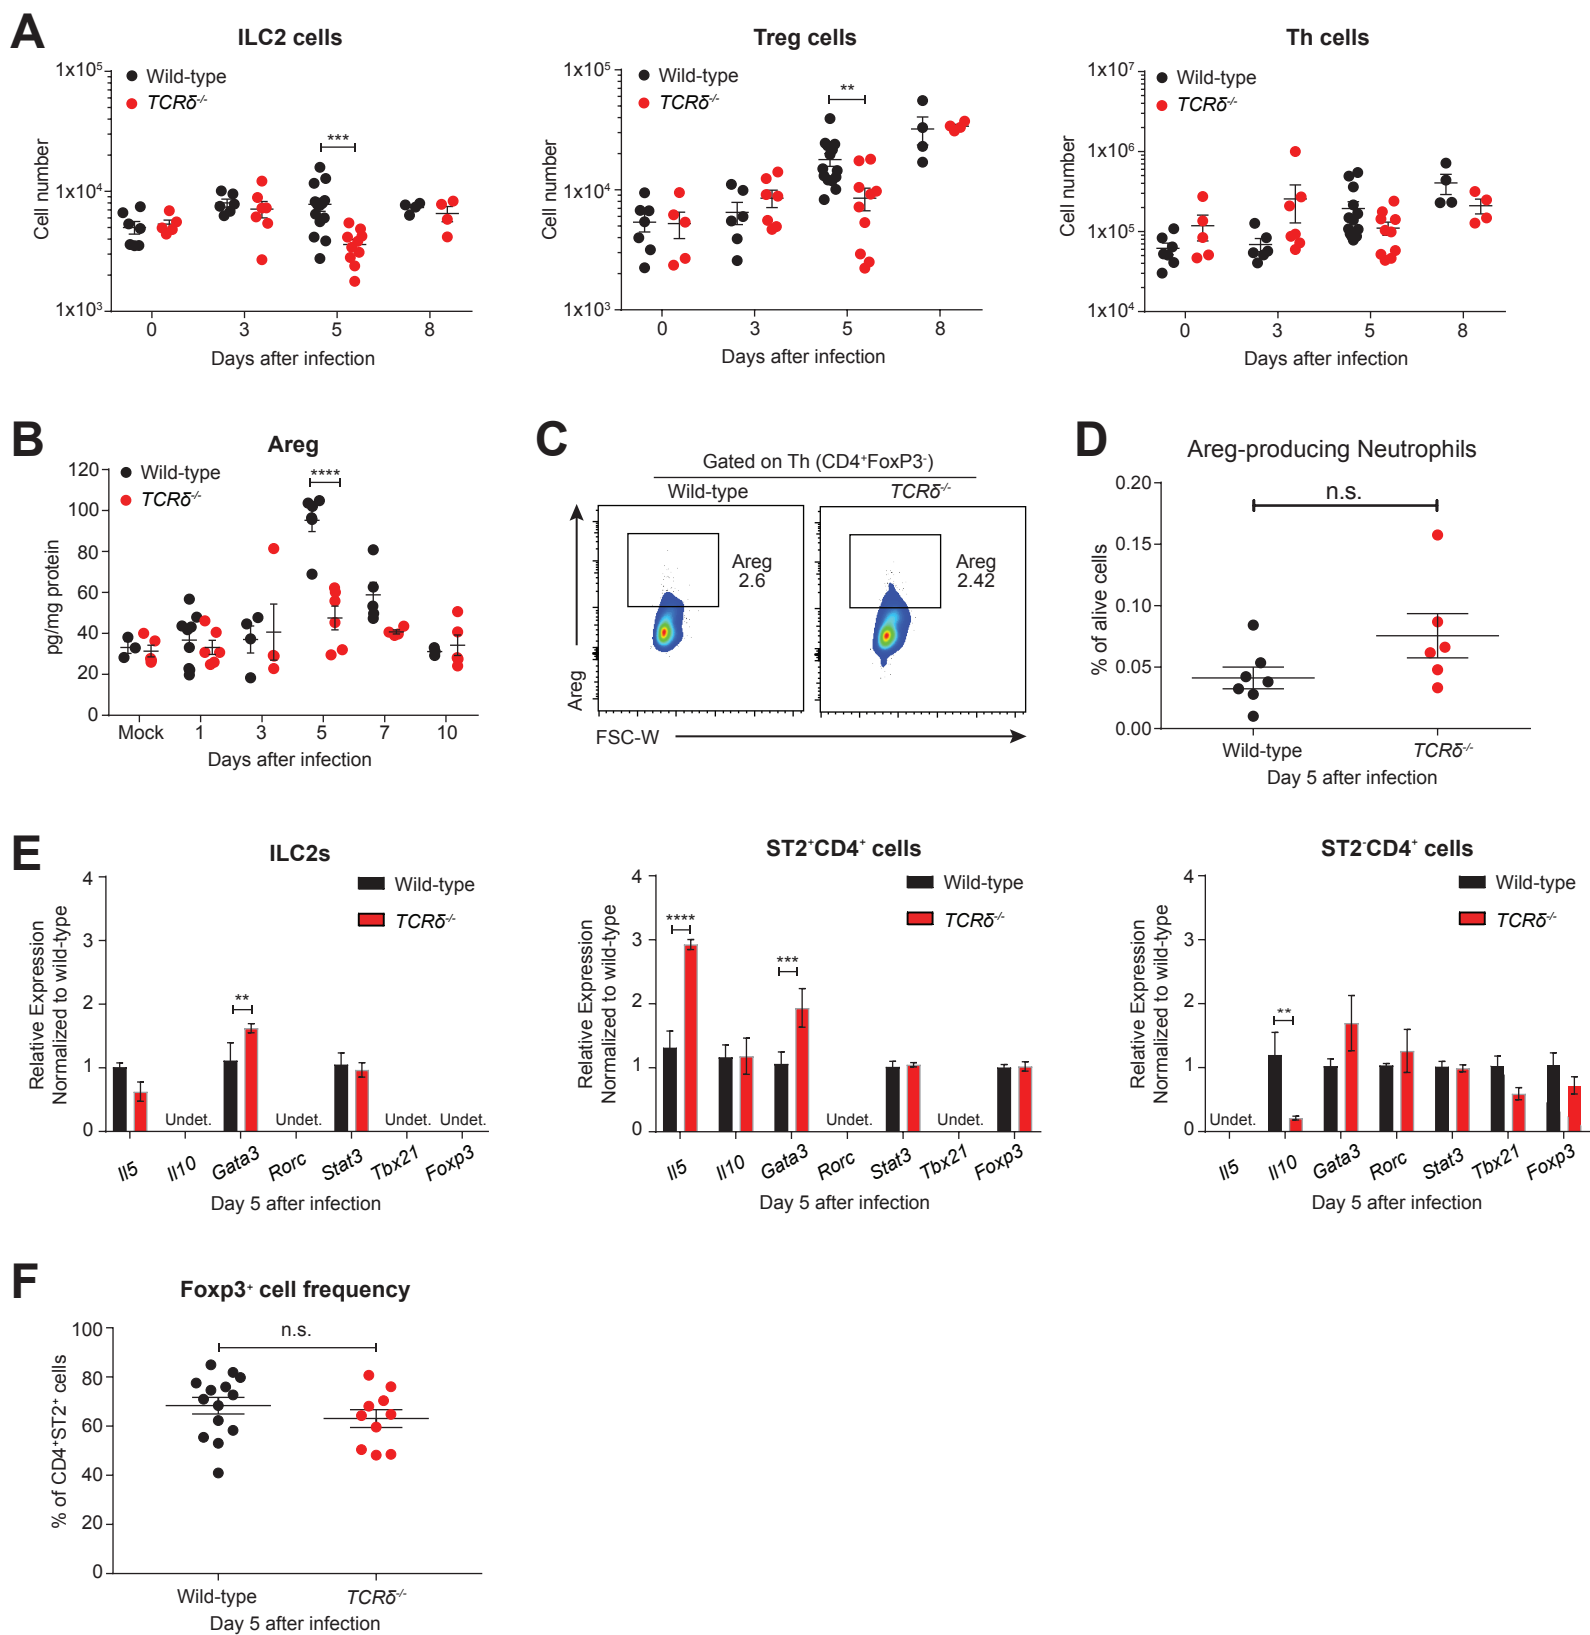

**Figure S5**

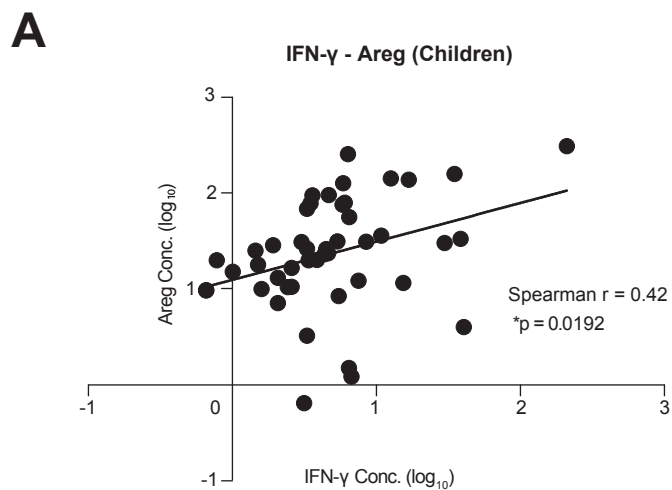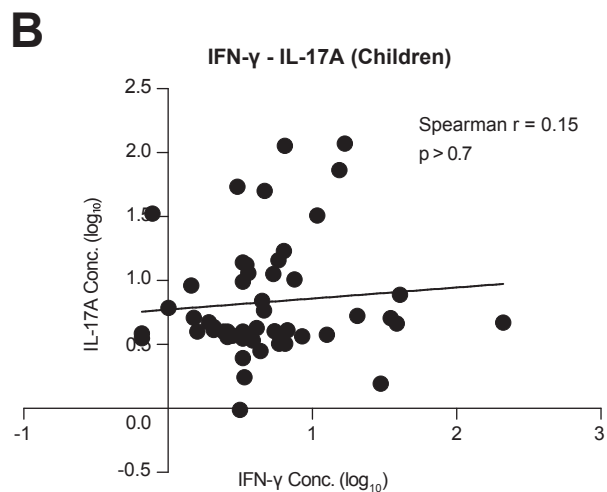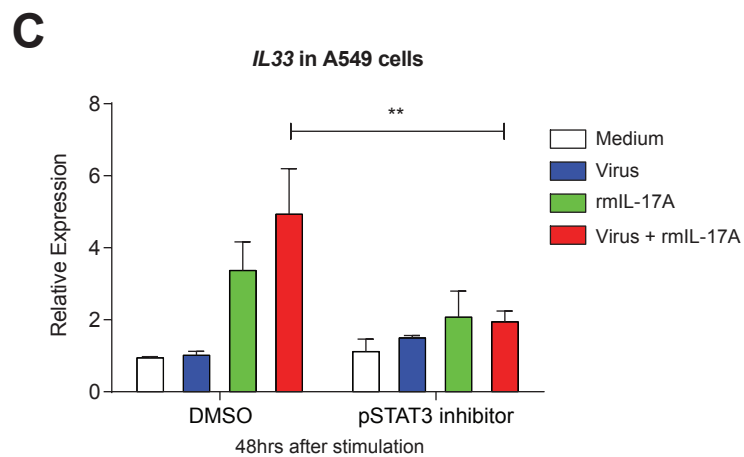

**Figure S6**

### Supplemental figure legends

#### Figure S1 Gating strategy and $\gamma\delta$ T cell prevalence in mock-infected lungs. Related to Figure 1.

- A. Schematic flow cytometric plots of the gating strategies employed during experiments.
- B. Frequency (left) and number (right) of  $\gamma\delta$  T cells in the lungs of wild-type neonates at days 7, 8, and 9 after birth (equivalent to d0, d1 and d2 of mock infection). Data are combined from two independent experiments and shown as mean  $\pm$  SEM. n.s., not significant.

#### Figure S2 The role of $\gamma\delta$ T cells in adult influenza infection. Related to Figure 1.

- A and B. Body weight profile (A) and survival rate (B) of wild-type (black, n=15) and  $TCR\delta^{-/-}$  (red, n=23) adults after virus infection, normalized to the original weight. Data are combined from four individual experiments and weight change data are shown as mean  $\pm$  SEM.
- C. Cell number of adult lung  $\gamma\delta$  T cells at indicated time point after infection.
- D. Cell number of adult lung IL-17A-producing  $\gamma\delta$  T cells at indicated time point after infection.
- E. Cell number of adult lung IFN- $\gamma$ -producing  $\gamma\delta$  T cells at indicated time point after infection.
- (C-E) Data are combined from two individual experiments with mock infection (n=7), or day 3 (n=10), day 5 (n=5), and day 8 (n=5) after influenza infection. \*\*p<0.01.

#### Figure S3 Characterization of $\gamma\delta$ T cells and neutrophils in influenza-infected neonatal lungs. Related to Figure 2.

- A. Frequency (top panel) and cell number (bottom panel) of lung  $\gamma\delta$  T cells (left), IL-17A-producing  $\gamma\delta$  T cells (middle) and IFN- $\gamma$ -producing  $\gamma\delta$  T cells (right), with mock infection (n=14), or day 1 (n=11), 2 (n=10), 5 (n=13), and 8 (n=7) after infection. Data are combined from at least two individual experiments at each time point and presented as mean  $\pm$  SEM.
- B. Frequency of IL-17A-producing  $\gamma\delta$  T cells in mock- (n=10) or influenza- (n=15) infected neonatal lungs at 1 day after infection, without PMA/Ionomycin stimulation. Data are combined from three individual experiments and presented as mean  $\pm$  SEM.
- C. Percent (left) and number (right) of neutrophils of wild-type or  $TCR\delta^{-/-}$  neonates with influenza- infected neonatal lungs at day 0, 3, 5 and 8 following infections. Data are pooled from nine independent experiments and at least two individual experiments at each time point. Data are shown as mean  $\pm$  SEM.
- D. TRGV family usage of CD27<sup>+</sup> (left) or CD27<sup>-</sup> (right)  $\gamma\delta$  T cells estimated by single-cell PCR at mock-infection, 2 days after influenza infection, and 6 days after influenza infection (top to bottom). TRGV sequence data in the pie chart present Mock-CD27<sup>+</sup> (n=11), Mock-CD27<sup>-</sup> (n=19), Day2-CD27<sup>+</sup> (n=65), Day2-CD27<sup>-</sup> (n=59), Day6-CD27<sup>+</sup> (n=45), and Day6-CD27<sup>-</sup> (n=32).
- \*p<0.05, \*\*p<0.01, \*\*\*p<0.001, \*\*\*\*p<0.0001, n.s., not significant. .

#### Figure S4 Cytokine expression and infected neonates survival with cytokine administration. Related to Figure 3.

- A. Survival rate of influenza-infected  $TCR\delta^{-/-}$  neonates administered with of high-dose of recombinant mouse IL-17A (rmIL-17A, navy, 1000pg/mouse, n=12) or PBS control (red, n=21) at the time of infection. Data are combined from five independent trials that individually showed the same trend, and data are presented as mean  $\pm$  SEM.
- B. Survival rate of influenza-infected wild-type neonates administered with recombinant mouse IL-17A (rmIL-17A, orange, 100pg/mouse, n=10) or PBS control (black, n=8) at the time of infection. Data are combined from two independent trials that individually showed the same trend, and data are presented as mean  $\pm$  SEM.
- C. Protein levels of IFN- $\gamma$ , IL-2, IL-1 $\beta$ , KC, GM-CSF and IP-10 assessed by Milliplex assay and normalized to the total protein in the lungs of infected wild-type (black, n=5) and  $TCR\delta^{-/-}$  (red, n=5) neonates at day 2 after infection. Samples are pooled from three individual experiments, and data are combined and presented as mean  $\pm$  SEM.
- D. Protein levels of IL-33 assessed by ELISA and normalized to the total protein in the lungs of infected wild-type (black) and  $TCR\delta^{-/-}$  (red) neonates at indicated time points after infection. Samples are pooled from at least two independent trials at each time point, and data are presented as mean  $\pm$  SEM.

E. Relative expression results of *Il33* gene in endothelial cells, epithelial cells, CD11c<sup>+</sup> cells, and lung fibroblasts isolated from neonatal lungs 2 days after infection (n=3). Data are presented as mean  $\pm$  SEM.

\*p<0.05, n.s., not significant.

**Figure S5 Areg expression dynamics during neonatal influenza infection. Related to Figure 5.**

A. Cell number of ILC2s, Treg cells, and Th cells in the lungs of wild-type (black) and *TCR $\delta^{-/-}$*  (red) influenza-infected neonates at various time point after infection. Data are combined from at least two individual experiments at each time point and shown as mean  $\pm$  SEM.

B. Abundance of Areg protein was assessed by ELISA and normalized to the total protein in the lungs of wild-type (black) and *TCR $\delta^{-/-}$*  (red) influenza-infected neonates at different time points. Samples are pooled from at least two individual experiments at each time point, and data are shown as mean  $\pm$  SEM.

C. Representative flow cytometric plots of Areg-producing Th cells in wild-type and *TCR $\delta^{-/-}$*  lungs at day 5 following infection.

D. Frequency of Areg-producing neutrophils in influenza-infected wild-type (n=7) and *TCR $\delta^{-/-}$*  (n=6) lungs at day 5 after infection. Data are combined from two individual experiments and shown as mean  $\pm$  SEM.

E. Relative gene expression of *Il5*, *Il10*, *Gata3*, *Rorc*, *Stat3*, *Tbx21* and *Foxp3* in ILC2s, ST2<sup>+</sup>CD4<sup>+</sup> cells and ST2<sup>-</sup>CD4<sup>+</sup> cells sorted from wild-type (n=5) and *TCR $\delta^{-/-}$*  (n=5) lungs at day 5 after infection. Samples are pooled from two independent experiments and data are presented as mean  $\pm$  SEM.

\*\*p<0.01, \*\*\*p<0.001, \*\*\*\*p<0.0001, n.s., not significant.

**Figure S6 Correlation of IFN- $\gamma$  - Areg and IFN- $\gamma$  - IL-17A in children, and *IL33* gene expression in stimulated A549 cells. Related to Figure 6.**

A. Correlation between concentration of human IFN- $\gamma$  (x-axis) and Areg (y-axis) in influenza-infected children (n=51). Cytokine values (pg/ml) were log<sub>10</sub> transformed for visualization.

B. Correlation between concentration of human IFN- $\gamma$  (x-axis) and IL-17A (y-axis) in influenza-infected children (n=51). Cytokine values (pg/ml) were log<sub>10</sub> transformed for visualization.

C. Relative expression of *IL33* transcripts in human lung epithelial cells (A549) treated with DMSO or the pSTAT3 inhibitor and stimulated for 48 hours with medium, influenza virus, rmIL-17A, or the virus-rmIL-17A combination. Data are shown as mean  $\pm$  SEM and combined from three separate experiments that independently showed the same trend. \*p<0.05, \*\*p<0.01.

Table S1 Primers for mouse  $\gamma\delta$  TCR sequencing. Related to STAR Methods - Single-cell Sorting and Multiplex PCR.

| Primer name | External                     | Internal                            |
|-------------|------------------------------|-------------------------------------|
| TRGV1-3For  | GCAGCTGGAGCAAACCTG           | CTGAATTATCGGTCACCAG                 |
| TRGV4For    | CAAATATCCTGTAAAGTTTTCA<br>TC | GTTTAGAGTTTCTATTATATGTCCTTGC<br>AAC |
| TRGV5For    | GATATCTCAGGATCAGCTCTC<br>C   | TACCCGAAGACCAAACAAGAC               |
| TRGV6For    | TCACCTCTGGGGTCATATG          | AGAGGAAAGGAAATACGGC                 |
| TRGV7For    | CAACTTGGAAGAAAGAATAAT<br>GTC | CACCAAGCTAGAGGGGTC                  |
| TRGCRov     | CTTTTCTTTCCAATACACCC         | TCDGGAAAGAACTTTTCAAGG               |
